# Supplementary material for: RanBP2 Modulates Cox11 and Hexokinase I Activities and Haploinsufficiency of RanBP2 Causes Deficits in Glucose Metabolism
Source: PubMed Central journal article supplement (PMC1626108; doi:10.1371/journal.pgen.0020177), 2006-10-27
Supplement: pgen.0020177.sg001.pdf [file pgen.0020177.sg001.pdf]

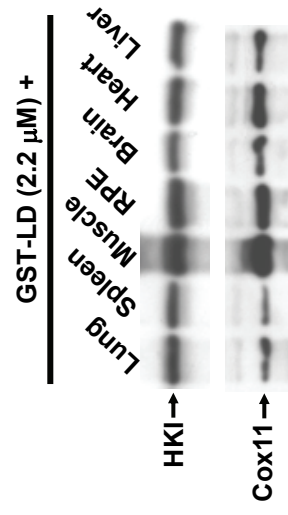

Figure S1
